# Supplementary material for: Sedjarah ilmu djiwa / Kohnstamm Palland
Source: Oxford University Press journal article supplement (doi:10.1242/dev.190900), 1957-01-01
Supplement: dev190900supp.pdf [file dev190900supp.pdf]

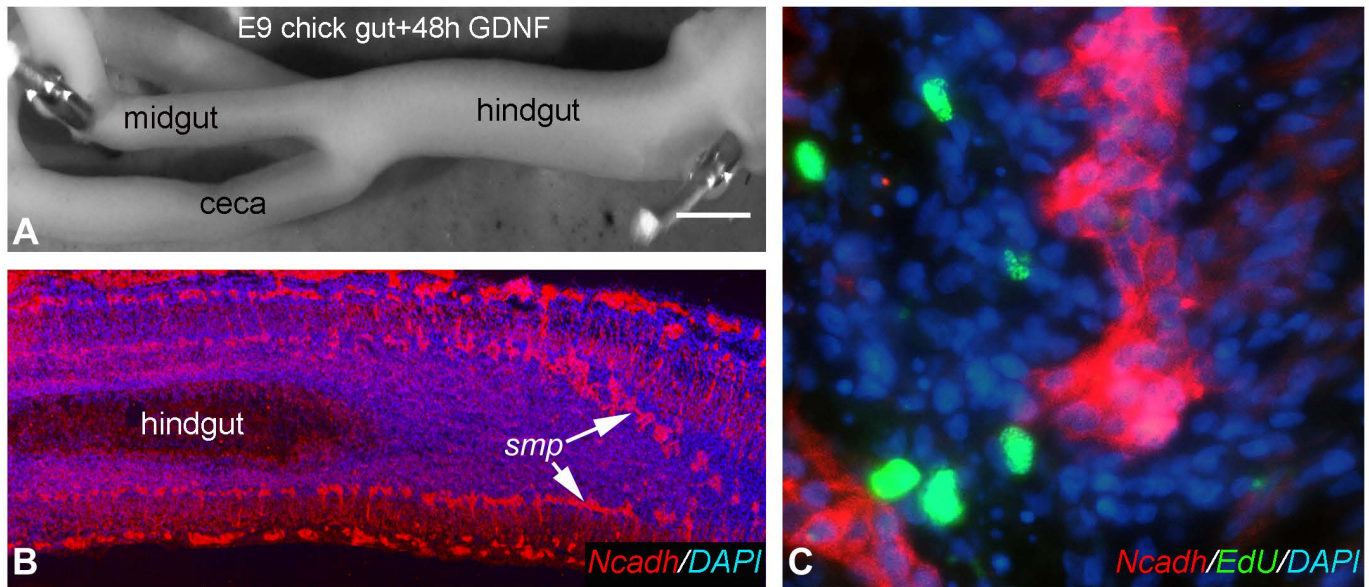

**Figure S1. The ability of GDNF to induce ganglioneuroma formation is time-limited.**

Addition of GDNF to explanted E9 intestine did not result in cell aggregate formation (A) and did not disrupt ENCC migration (B). Furthermore, EdU+ ENCCs were rarely observed (C). smp, submucosal plexus. Scale bar in A: 500  $\mu$ m in A; 200  $\mu$ m in B; 27  $\mu$ m in C.
